# Supplementary material for: Functional analysis of Salix purpurea genes support roles for ARR17 and GATA15 as master regulators of sex determination
Source: PubMed Central journal article supplement — Plant Direct. 2023 Nov 15;7(11):e3546. doi: 10.1002/pld3.546 (PMC10651977; doi:10.1002/pld3.546), 2023-11-15
Supplement: PLD3-7-e3546-s003.pdf [file PLD3-7-e3546-s003.pdf]

## Supplemental Figures

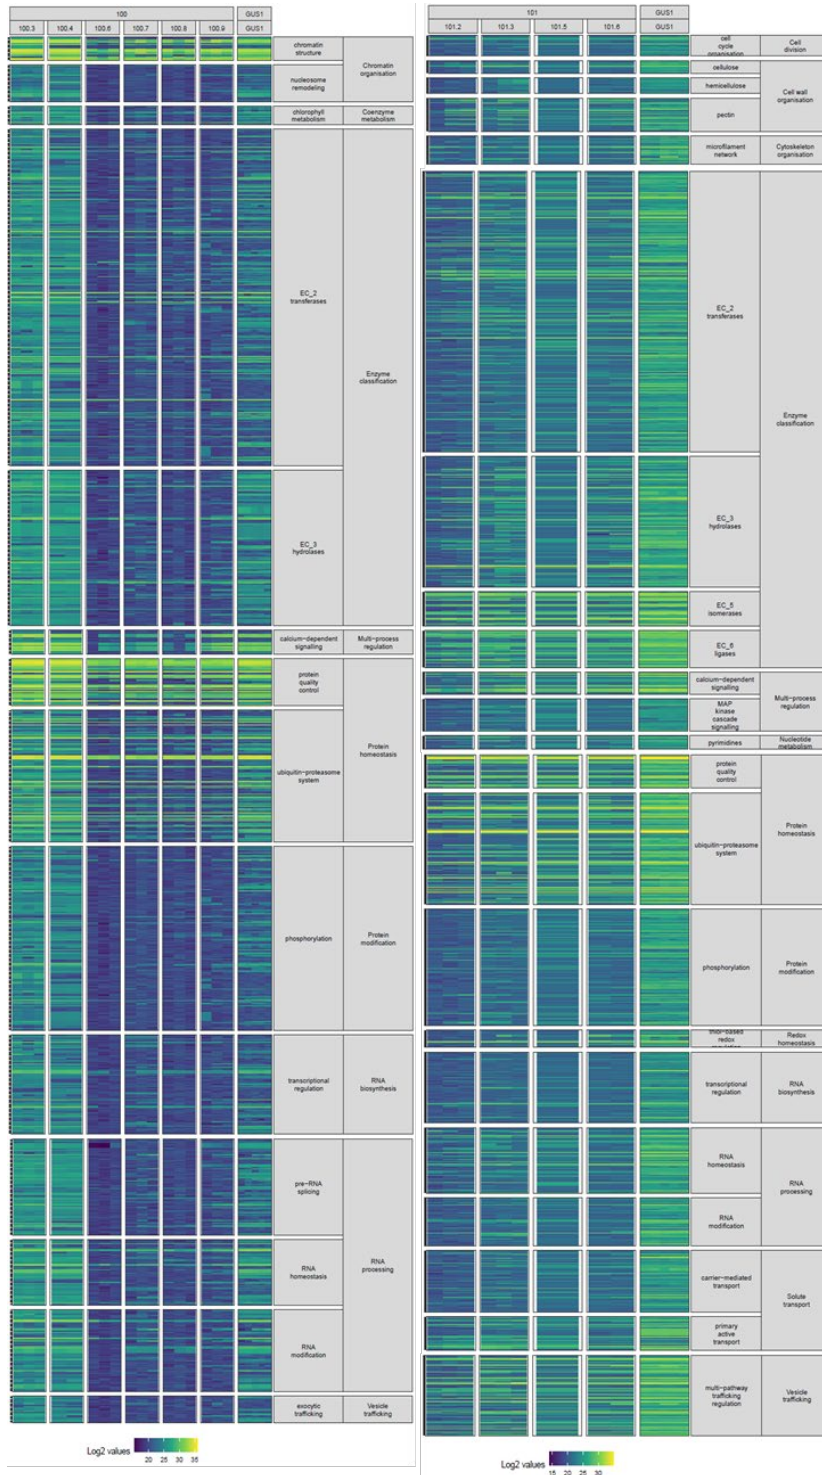

**Figure S1.** Heatmap displaying the total expression of significantly differentially abundant proteins in the MapMan enriched functional categories for the *ARR17* (100) and *GATA15* (101) expression lines, compared to the pGFPGUSPlus empty vector control (GUS1). Each column represents data from a unique transgene event.

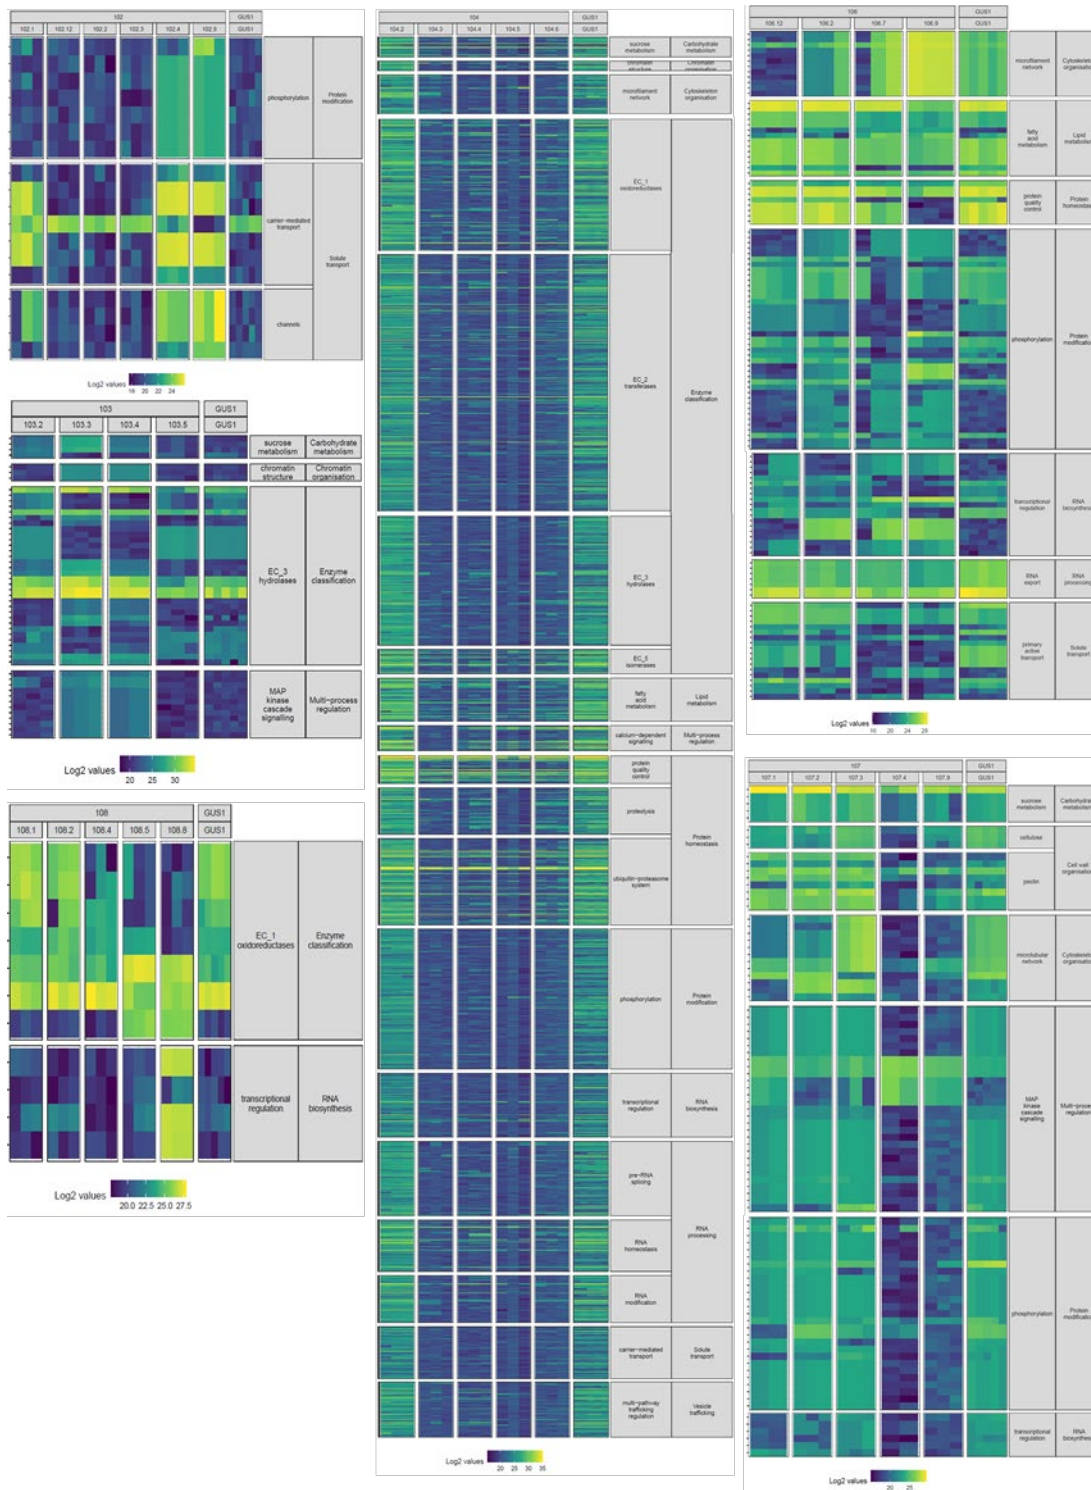

**Figure S2.** Heatmap displaying the total expression of each gene in the MapMan enriched functional categories for the CCHC Zinc Finger (102) *DRB1* (103) Sapur.15WG074900 hypothetical protein (104), Sapur.15WG075700 hypothetical protein (106), *LEAFY* (107), and *FT* (108) expression lines, compared to the pGFPGUSPlus empty vector control (GUS1). Each column represents data from a unique transgene event.

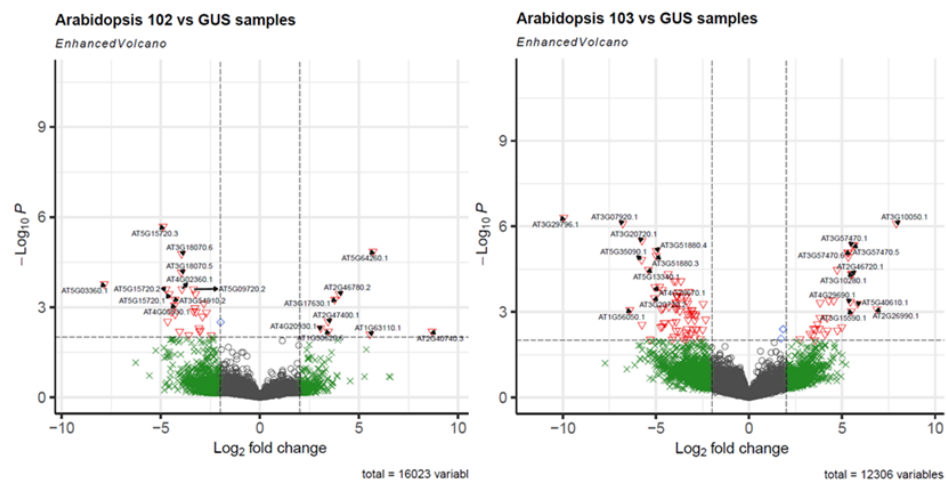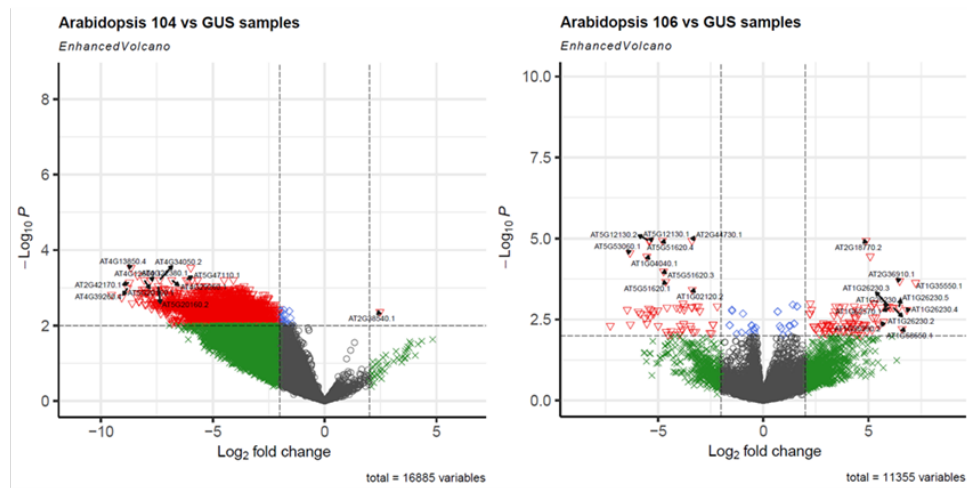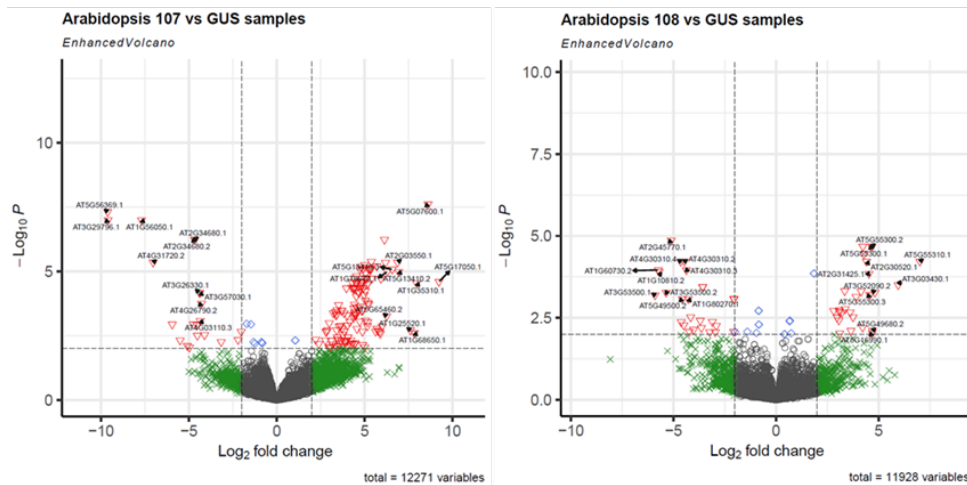

**Figure S3.** Volcano plots displaying the total differential abundant protein results and top ten significant up and down regulated proteins for the Sapur.15WG068800 CCHC Zinc Finger nuclease (102), Sapur.15WG074300 *DRB1* (103), Sapur.15WG074900 hypothetical protein (104), Sapur.15WG075700 hypothetical protein (106), *LEAFY* (107), and *FT* (108) expression lines, relative to the empty vector control.



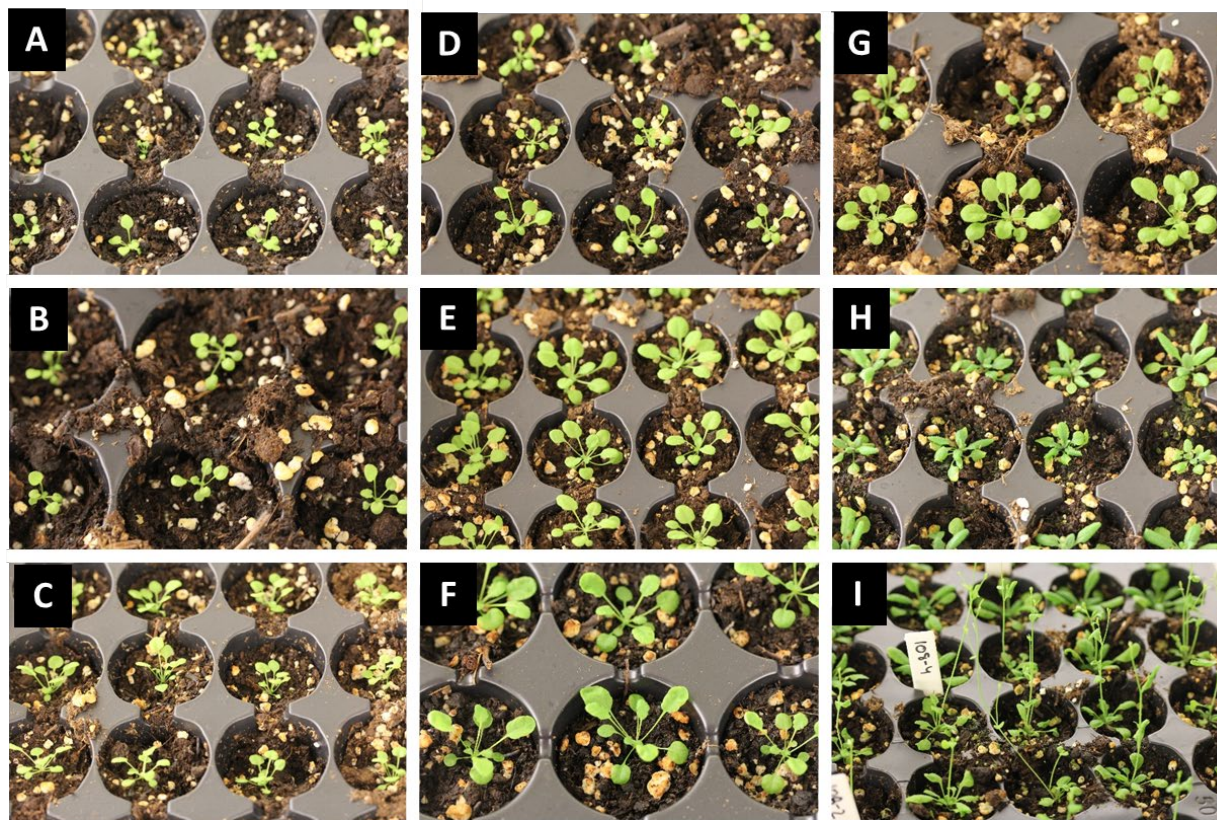

**Figure S4.** Comparison of transgenic *Arabidopsis* seedlings 23 days after germination. (A) empty vector control; (B) overexpression of *ARR17*, Sapur.15WG073500; (C) overexpression of *GATA15*, Sapur.15WG062800; (D) overexpression of CCHC zinc finger, Sapur.15WG068800; (E) overexpression of *DRB1*, Sapur.15WG074300; (F) overexpression of hypothetical protein, Sapur.15WG074900; (G) overexpression of hypothetical protein, Sapur.015WG075700; (H) overexpression of *LEAFY*, Sapur.15WG122200; (I) overexpression of *FT*, Sapur.008G061900.

### A 94006 Female library

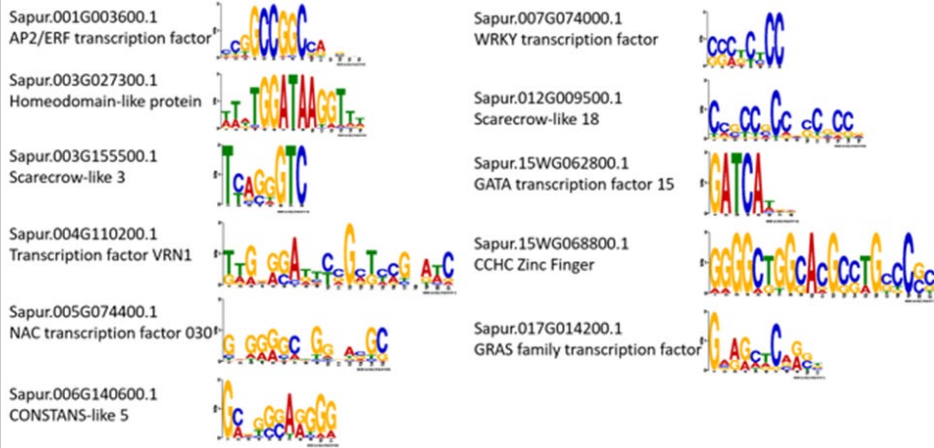

### B 'Fish Creek' Male library

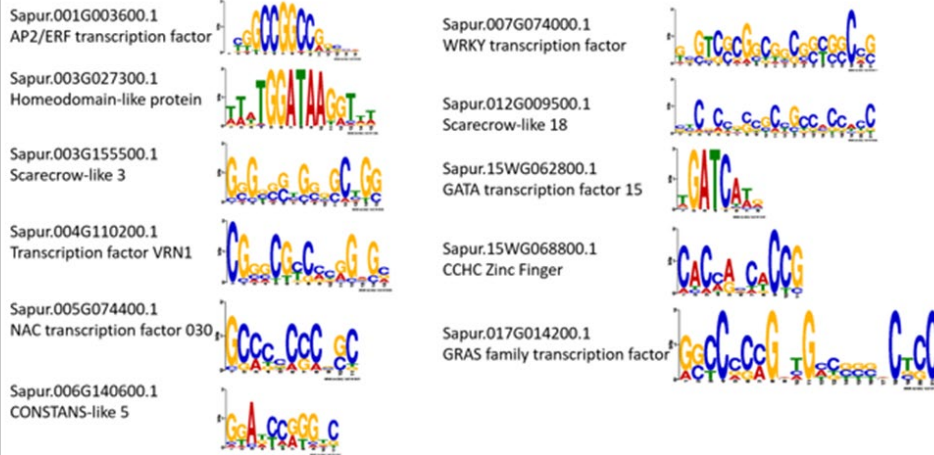

**Figure S5.** Predicted binding motifs for each transcription factor tested in DAP-Seq. A. Predictions from the 94006 library (female); B. Predictions from the 'Fish Creek' library (male).

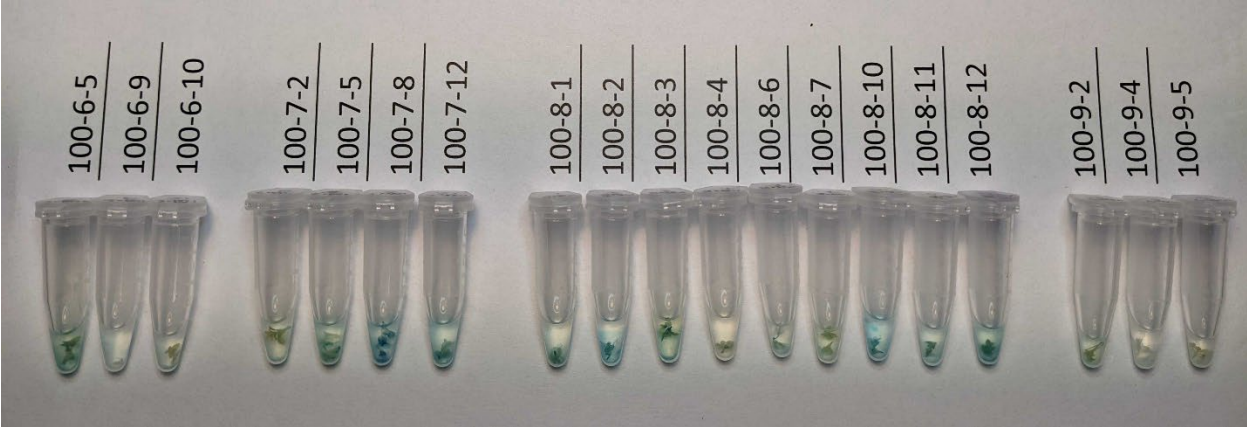

**Figure S6.** GUS staining assay results for representative samples of T<sub>2</sub> flowers after ethanol staining
